# Supplementary material for: The triad interaction of ULK1, ATG13, and FIP200 is required for ULK complex formation and autophagy
Source: eLife. 2025 Jun 24;13:RP101531. doi: 10.7554/eLife.101531 (PMC12187132; doi:10.7554/eLife.101531)
Supplement: Figure 1—source data 3. [file elife-101531-fig1-data3.xlsx]

## Sheet: Figure1F
(-)	WT	F2A
0.023701	1	0.140212
0.028285	1	0.144412
0.082323	1	0.175106
