# Supplementary material for: The triad interaction of ULK1, ATG13, and FIP200 is required for ULK complex formation and autophagy
Source: eLife. 2025 Jun 24;13:RP101531. doi: 10.7554/eLife.101531 (PMC12187132; doi:10.7554/eLife.101531)
Supplement: Figure 2—source data 3. [file elife-101531-fig2-data3.xlsx]

## Sheet: Fugure2E
WT HeLa	ATG13 KO	WT	ULK2A
1	0.299995	0.491814	0.207141
1	0.398372	0.582801	0.239123
1	0.488403	0.921405	0.32392
