# Supplementary material for: The triad interaction of ULK1, ATG13, and FIP200 is required for ULK complex formation and autophagy
Source: eLife. 2025 Jun 24;13:RP101531. doi: 10.7554/eLife.101531 (PMC12187132; doi:10.7554/eLife.101531)
Supplement: Figure 3—source data 3. [file elife-101531-fig3-data3.xlsx]

## Sheet: Figure3D
GST	GST-ULK1 WT	GST-ULK1 FIP2A
0.018555	1	0.249131
0	1	0.27079
0.0234033	1	0.384605

## Sheet: Figure3F_FIP200
(-)	WT	F2A
0.19635	1	0.204228
0.253769	1	0.222822
0.229265	1	0.140958

## Sheet: Figure3F_ATG13
(-)	WT	F2A
0.093628	1	0.327858
0.108418	1	0.203351
0.098841	1	0.274152

## Sheet: Figure3H
(-)	WT	FIP2A
0.517399	1	0.665633
0.479783	1	0.722055
0.512679	1	0.748445
