# Supplementary material for: The triad interaction of ULK1, ATG13, and FIP200 is required for ULK complex formation and autophagy
Source: eLife. 2025 Jun 24;13:RP101531. doi: 10.7554/eLife.101531 (PMC12187132; doi:10.7554/eLife.101531)
Supplement: Figure 4—figure supplement 1—source data 3. [file elife-101531-fig4-figsupp1-data3.xlsx]

## Sheet: Figure-S3B
WT	O/X	KI
1	33.0356	0.710195
1	23.6199	0.966754
1	19.8669	0.587924

## Sheet: Figure-S3E
WT HeLa	ATG13 KO	WT KI	FIP3A KI	ULK2A KI	FU5A KI
1	0.127148	1.24826	0.705822	1.17509	0.552315
1	0.138139	1.08174	0.65857	1.24528	0.682111
1	0.141486	1.07675	0.596538	1.04534	0.635736
