# Supplementary material for: The triad interaction of ULK1, ATG13, and FIP200 is required for ULK complex formation and autophagy
Source: eLife. 2025 Jun 24;13:RP101531. doi: 10.7554/eLife.101531 (PMC12187132; doi:10.7554/eLife.101531)
Supplement: Figure 4—source data 3. [file elife-101531-fig4-data3.xlsx]

## Sheet: Fugure4E
WT HeLa	ATG13 KO	WT	FIP3A	ULK2A	FU5A
1	0.368156	0.786925	0.458472	0.60528	0.215587
1	0.318985	0.744795	0.469976	0.618739	0.220859
1	0.32092	0.763313	0.476841	0.616694	0.301094
